# Supplementary material
Source: Springer Nature journal article supplement (https://www.springerprofessional.de/resource/supplementary/40493_2014_8_MOESM10_ESM.pdf/11899610)

# The Efficiency of Normal Dispersion Attack

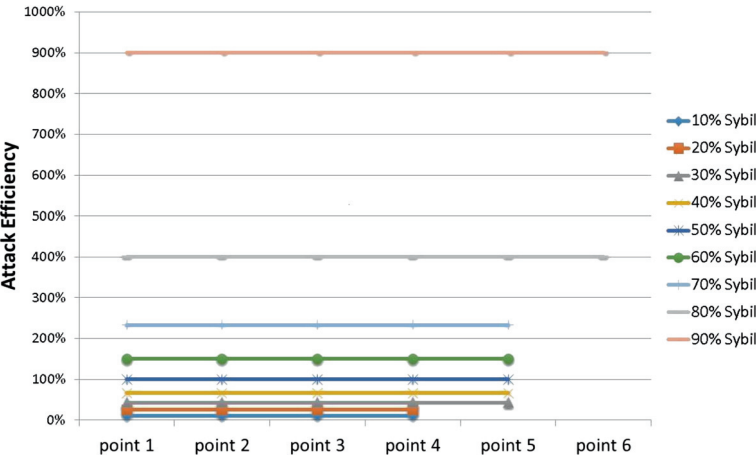

Supplement: MOESM10 [file 11899610]
